# Supplementary material
Source: PubMed Central journal article supplement (PMC7925477)
Supplement: 12975_2020_819_MOESM1_ESM.pdf [file 12975_2020_819_MOESM1_ESM.pdf]

## **Birjandi et al Supplement.**

Supplemental Figures 1 – 7

Tales 1-4

### **Supplemental Figure Captions**

**Figure 1. Timeline of Striatal and Cortical Strokes.** (A) Experimental Groups for TAK-063 treatment for both striatal and cortical strokes. (B) Overall study timeline for TAK-063 treatment post-striatal and (C) cortical stroke. Baseline behavior testing was assessed 1 week (Wk) prior stroke. Once daily i.p. TAK-063 treatment began 5 days post-stroke for 9 Wks. Behavior testing was performed on Wks 1, 3, 6, and 9. BDA injections were performed upon completion of behavior testing and mice were euthanized at 10 Wks post stroke.

**Figure 2. Cylinder Task in Behavioral Recovery.** Overall this task showed great variability between animals and across time points. (A) In post-striatal stroke of the left hemisphere, the Cylinder task revealed that Stroke + 3.0 mg/kg versus Stroke + Vehicle had an overall increased right paw use over the 9-week treatment;  $P = , P = 0.0558$ . (B) In post-cortical stroke of the left hemisphere, the Cylinder task revealed no differences in Stroke + Vehicle versus treatment groups. Data were analyzed by GLMs with Tukey's HSD.

**Figure 3. Timeline of Striatal BDNF Quantification.** (A) Experimental Groups for TAK-063 treatment for striatal strokes and overall study timeline for BDNF quantification in TAK-063 treatment post-striatal stroke. Once daily i.p. TAK-063 treatment began 5 days post-stroke for 3 weeks (Wks). Behavior testing was performed on Wks 1, 3, 6, and 9. Mice were euthanized at 3 Wks post stroke.

**Figure 4. BDNF Levels in Contralateral Striatum.** Treatment with TAK-063 resulted no differences in BDNF levels in Stroke + Vehicle compared to other treatment groups in contralateral striatum. Error bars represent mean  $\pm$  SEM for  $n = 3-4$  per group.

**Figure 5. Timeline of Angiogenesis, Neurogenesis, and Gliosis Study.** (A) Experimental Groups for EdU tracking for TAK-063 treatment post-striatal stroke. (B) Overall study timeline for Neurogenesis studies of TAK-063 (PDE10Ai-01) treatment post-striatal stroke. Striatal strokes were performed day 0 and starting day 2, mice were given twice daily EdU i.p. for 5 consecutive days. Starting day 7 post-striatal stroke, EdU was added in to drinking water and changed every 48 hrs. Once daily i.p. TAK-063 treatment began 5 days post-stroke for 6 weeks (Wks). Mice were euthanized at 6 Wks post stroke.

**Figure 6. Cortical Stroke Infarct Volumes.** (A) The graph quantifies the degree of stroke. The Y-axis indicates the normalized ratio of the ipsilateral stroked hemisphere over the contralateral non-stroked hemisphere. Data show that there was no effect between the treatment groups; however (A) Stroke + 3.0 mg/kg and Stroke + Vehicle group shows a significant difference compared to Sham + Vehicle measured from 1.10 mm to -2.06 mm

from Bregma; \* $P = 0.0003$ ; \* $P = 0.0001$ ;  $n = 10-11$  per group. (B) The combined sham controls versus the combined stroke groups ( $n = 20$  and  $42$ , \* $P = 0.0001$ ). All  $p$ -values corrected for multiple comparisons. Error bars represent mean  $\pm$  SEM.

**Figure 7. Striatal Stroke Infarct Volumes.** The graph quantifies the degree of stroke. The Y-axis indicates the normalized ratio of the ipsilateral stroked hemisphere over the contralateral non-stroked hemisphere. Data show that there was a significant effect between the Sham + Vehicle compared to Stroke + Vehicle measured from  $-0.22$  mm to  $-1.94$  from Bregma; \* $P = 0.0036$ ;  $n = 8-10$  per group.

**Table 1.** Statistical tests performed with corresponding  $t$ -values,  $df$ ,  $F$ , and  $z$  values where appropriate.

**Tables 2-4.** Raw data for ELISA studies of proBDNF, p75NTR and pTrkB. None of this data shows statistical significance across experimental groups.

#### **Details of the animals excluded from the study:**

The experimental groups and data behind Table 1 are:

Figures 1(A), 4, and 6 are data from the same cohort of experiments. We started with an  $n$  of 10 for each group in the striatal studies. Post-stroke surgical complications (e.g. cut of vagus nerve, overdose of anesthesia, bleeding, etc) resulted in the following reductions of  $n$ 's in each group:

Sham + Vehicle:  $n = 10$   
Sham + 3.0 mg/kg:  $n = 10$   
Stroke + Vehicle:  $n = 8$   
Stroke + 0.3 mg/kg:  $n = 9$   
Stroke + 3.0 mg/kg:  $n = 10$   
Stroke + 10 mg/kg:  $n = 9$

Figures 1(B) and Supplemental 5: Note  $n$ 's were increased (10 or 11) to cover possible initial surgical losses. Loss due to complications of surgery occurred in the Sham + 3.0 mg/kg (1 animal). Stroke + 0.3 mg/kg (2 animals) showed no evidence of stroke post mortem.

Sham + Vehicle:  $n = 10$   
Sham + 3.0 mg/kg:  $n = 9$   
Stroke + Vehicle:  $n = 10$   
Stroke + 0.3 mg/kg:  $n = 8$   
Stroke + 3.0 mg/kg:  $n = 11$   
Stroke + 10 mg/kg:  $n = 11$

Figure 2 is representative of a separate cohort of experiments to determine BDNF protein levels. Fresh brains are needed for the ELISA assay, therefore a separate experimental

group needed to be run. Given that we saw significant differences in the Stroke + 3.0 mg/kg TAK-063 group in the behavioral data only, we repeated the study excluding the 0.3 mg/kg and 10 mg/kg groups since no functional recovery was observed in these mice. The 1.0 mg/kg group was added to demonstrate a dose dependent response. The n's remained 10 per group as no animals were lost due to post-stroke surgical complications.

Sham + Vehicle: n = 10  
Sham + 3.0 mg/kg: n = 10  
Stroke + Vehicle: n = 10  
Stroke + 1.0 mg/kg: n = 10  
Stroke + 3.0 mg/kg: n = 10

Supplemental Figure 3: is representative of a separate cohort of experiments to determine BDNF levels in the contralateral hemisphere of striatal stroked mice given daily TAK-063. The sample size initially was 4. In the Stroke + 1.0 mg/kg 1 mouse was removed from the study as no striatal stroke was observed post mortem.

Sham + Vehicle: n = 4  
Sham + 3.0 mg/kg: n = 4  
Stroke + Vehicle: n = 4  
Stroke + 1.0 mg/kg: n = 3  
Stroke + 3.0 mg/kg: n = 4

Figure 3 is representative of a separate cohort of experiments to determine axonal sprouting via BDA. The sample size initially was 5. This separate cohort was repeated, to confirm the results obtained from the first cohort of BDA studies as the n's were quite low. The below loss of n's in the groups were due to no presence of BDA, therefore quantification of axonal sprouting could not be performed on those mice.

Sham + Vehicle: n = 5  
Sham + 3.0 mg/kg: n = 4  
Stroke + Vehicle: n = 4  
Stroke + 0.3 mg/kg: n = 4  
Stroke + 3.0 mg/kg: n = 5

Figure 5 is representative of a separate cohort of experiments to determine neurogenesis, gliogenesis, and angiogenesis. In order to determine cell proliferation, animals needed to be administered EdU daily and could not be paired with the initial studies done in Figure 1, 4, and 6. The sample size initially was 5 for each group. During stroke the normal n's were lost due to surgical complications resulting in the below n's. Additionally, 1 animal from the Stroke + Vehicle and 2 animals from the Stroke + 0.3 mg/kg were found to have no evidence of stroke post mortem and were excluded from the study.

Sham + Vehicle: n = 4  
Sham + 3.0 mg/kg: n = 4

Stroke + Vehicle: n = 4  
Stroke + 0.3 mg/kg: n = 3  
Stroke + 3.0 mg/kg: n = 5

# A

## Experimental Groups For Striatal and Cortical Strokes

Stroke mice divided into the following groups:

- Group 1: Sham + Vehicle\*
- Group 2: Sham + 3.0 mg/kg
- Group 3: Stroke + Vehicle
- Group 4: Stroke + 10.0 mg/kg
- Group 5: Stroke + 3.0 mg/kg
- Group 6: Stroke + 0.3 mg/kg

# Overview of Experimental Design (Striatal Strokes)

**B**

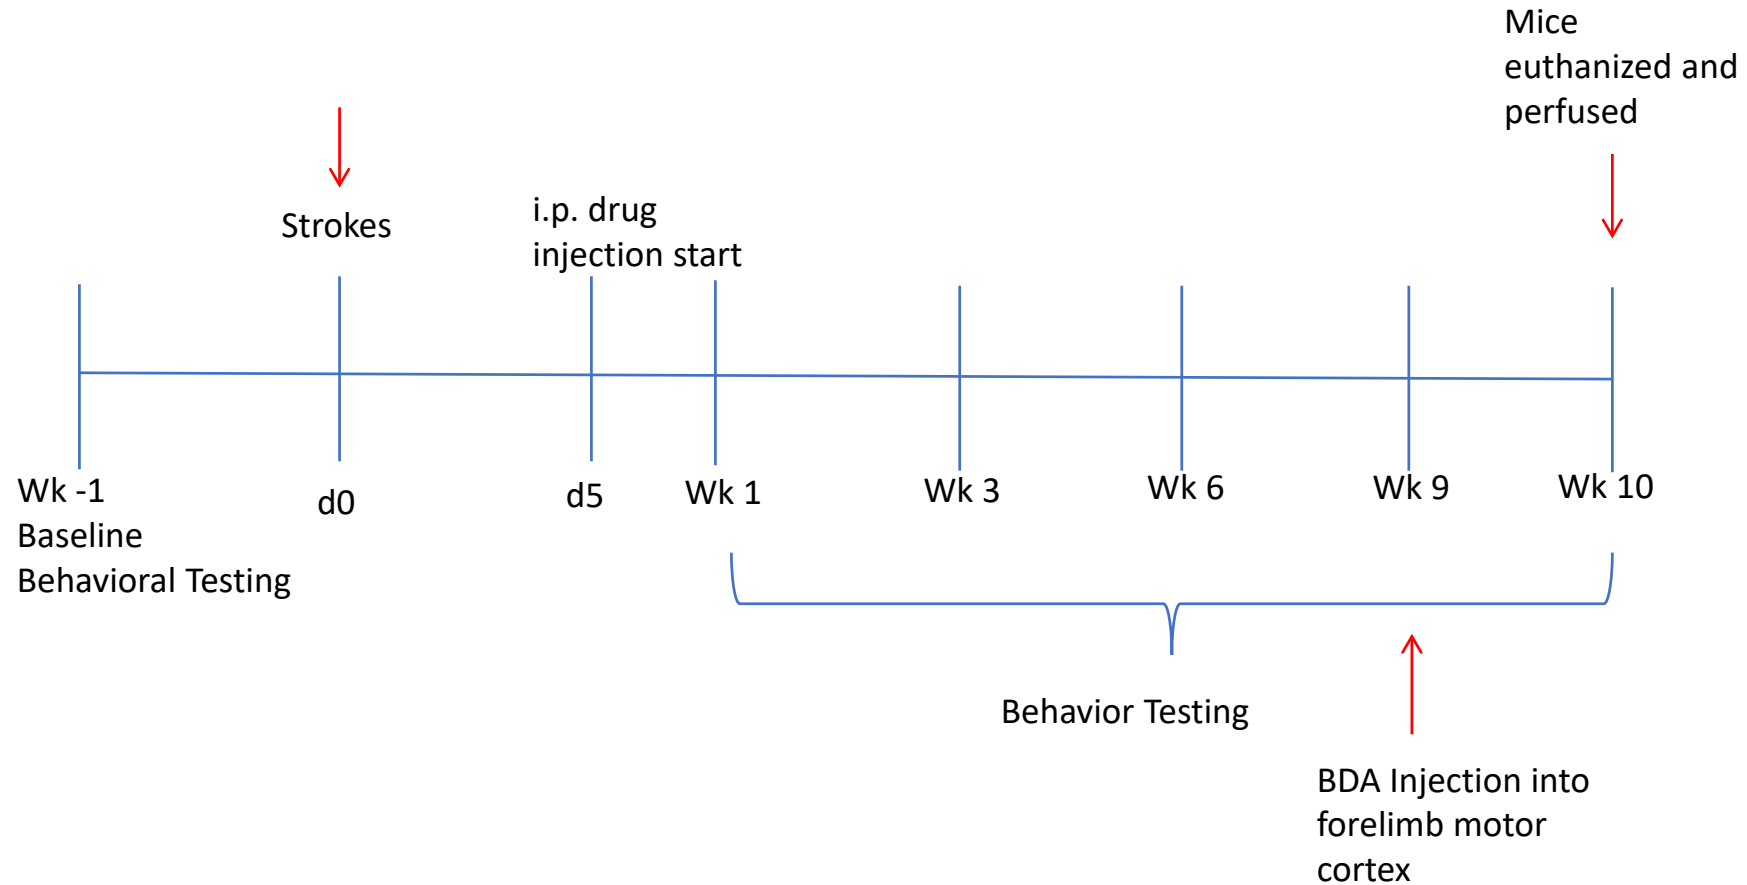

# Overview of Experimental Design (Cortical Strokes)

C

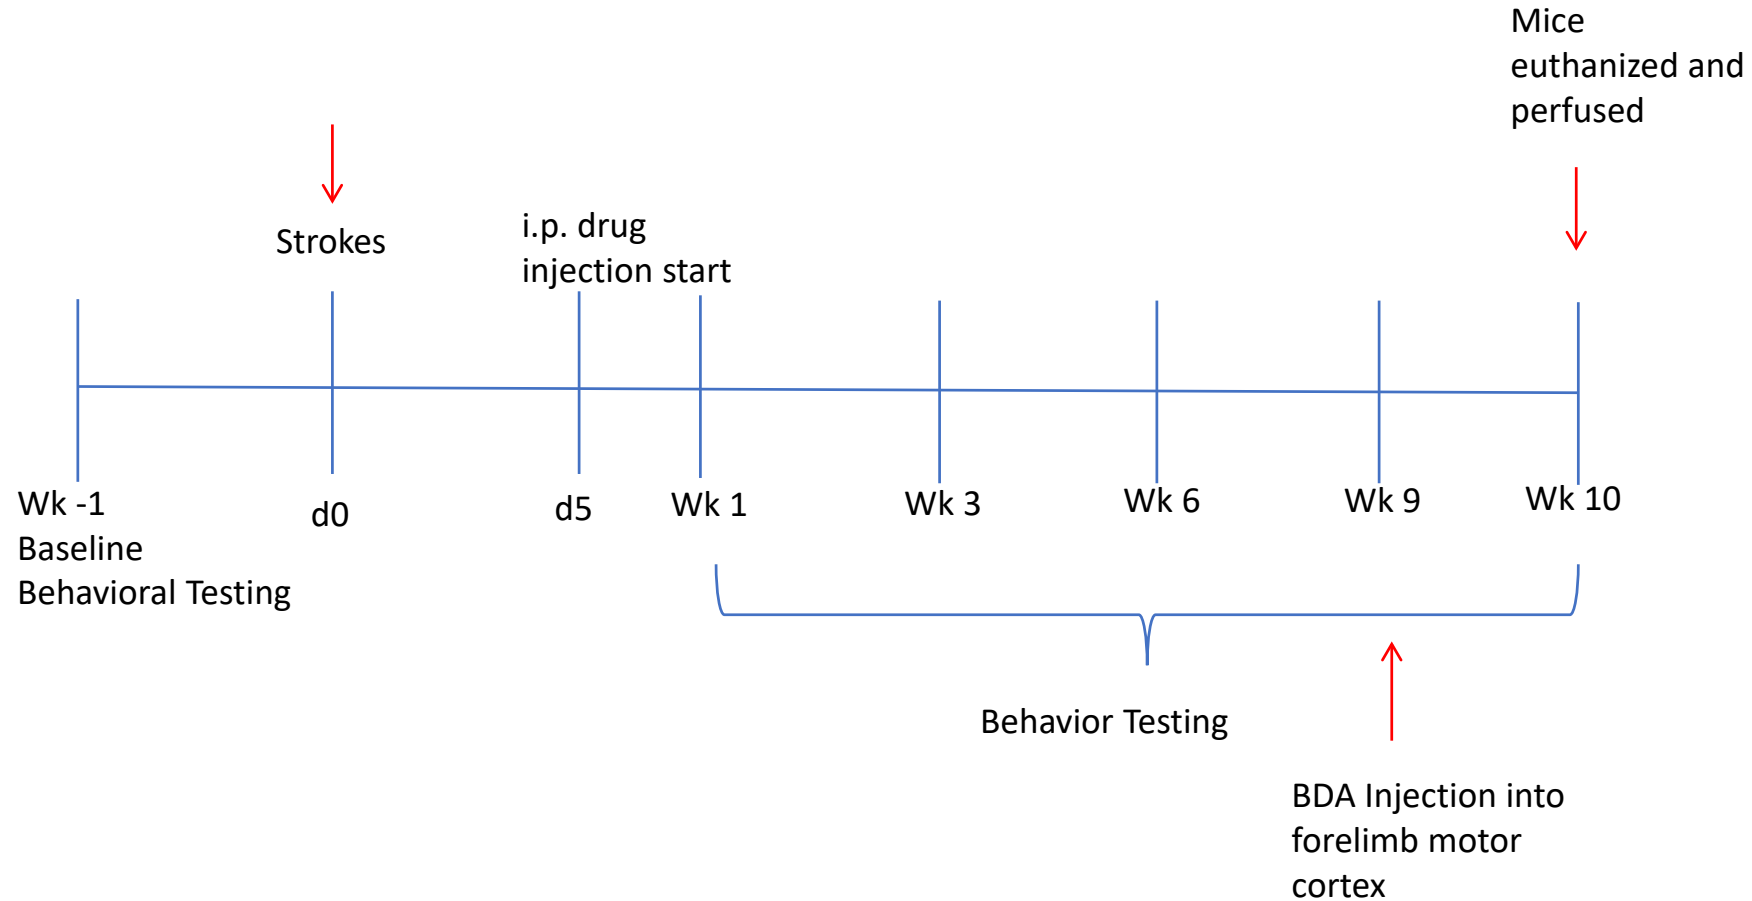

# Supplemental Figure 2

Cylinder task

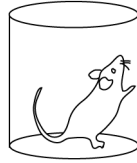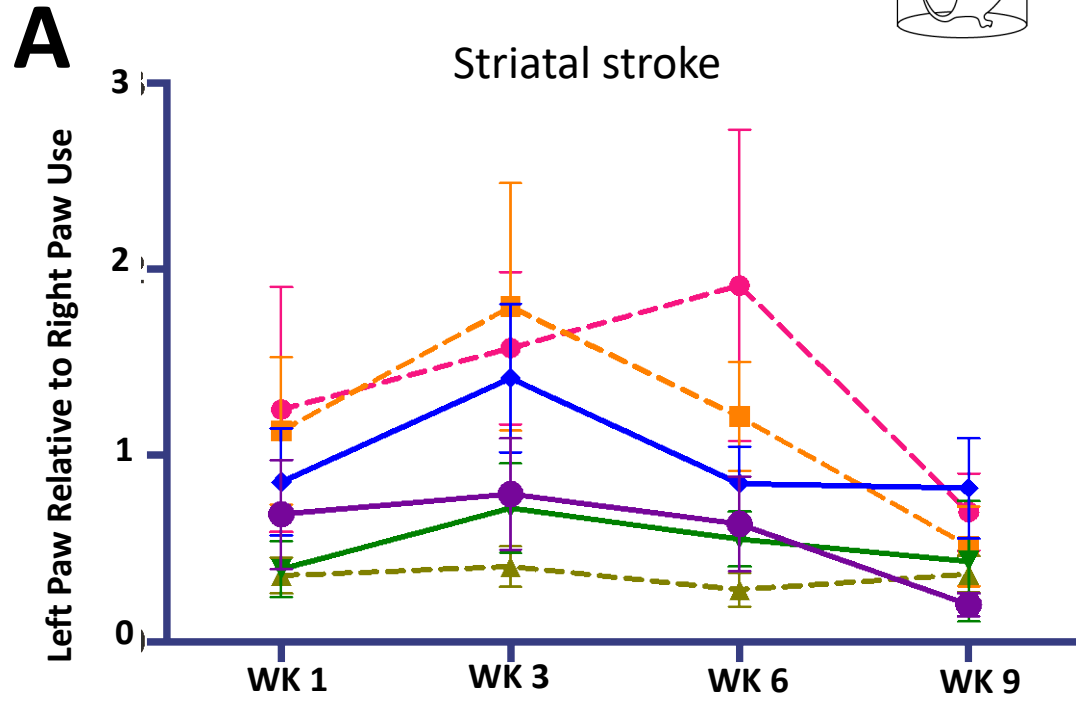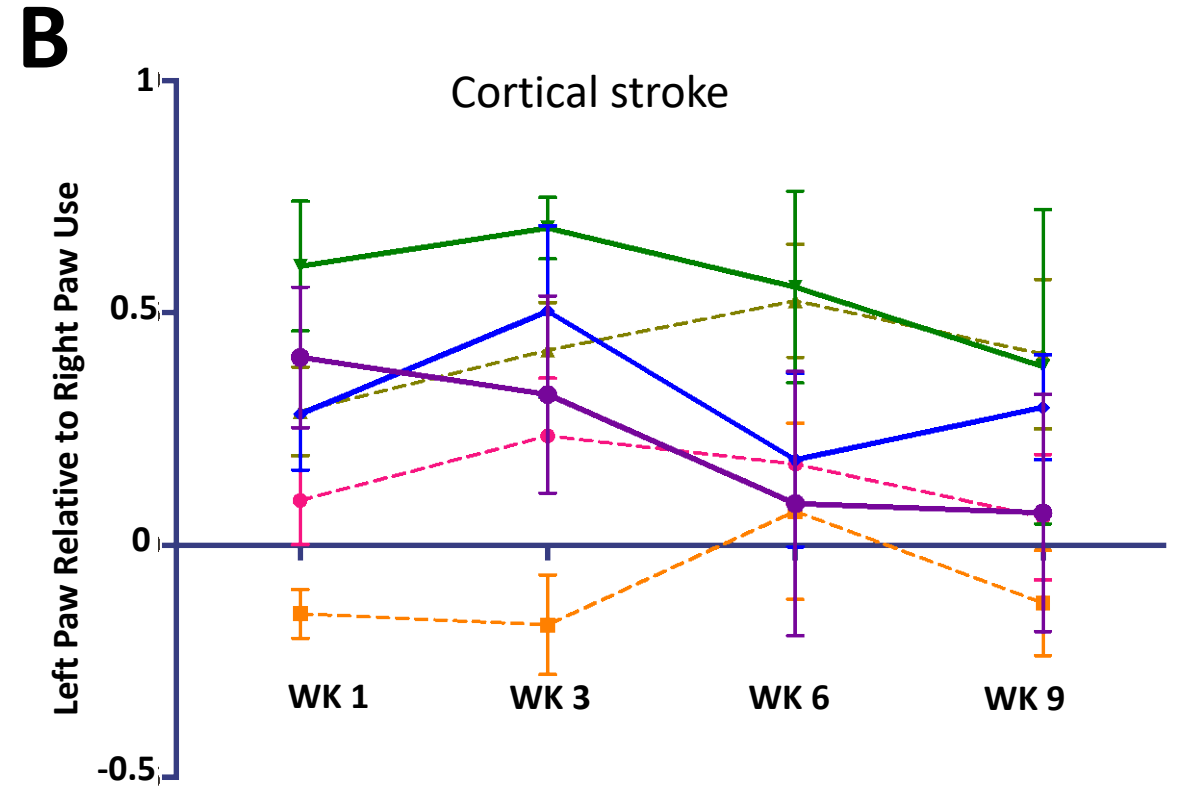



# Quantification of BDNF (Striatal Strokes)

## A

Stroke mice were divided into the following groups:

Group 1: Sham + Vehicle

Group 2: Stroke + Vehicle

Group 3: Stroke + 1mg/kg

Group 4: Stroke + 3mg/kg

## B

Experimental Design

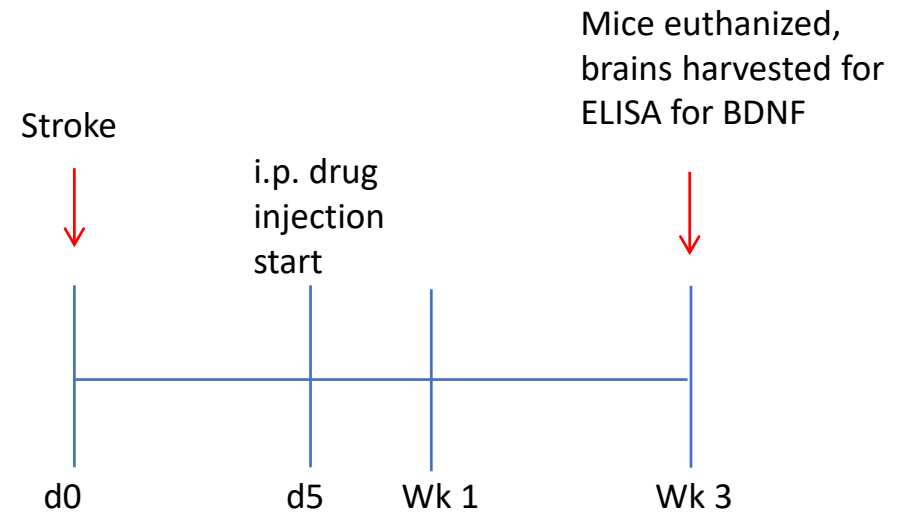

Supplemental Figure 4

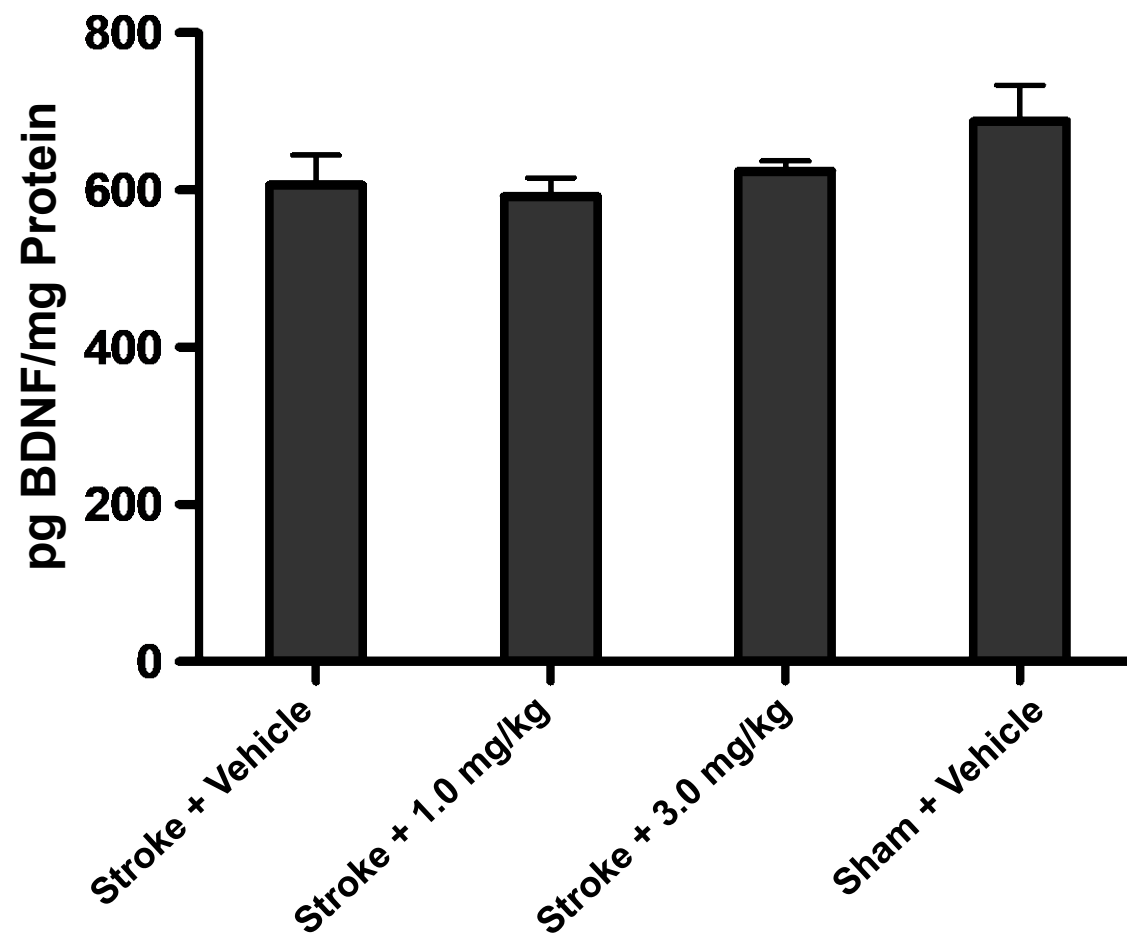

# A

## Experimental Groups (Neurogenesis – Striatal Strokes)

Stroke mice divided into the following groups:

- Group 1: Sham + Vehicle\*
- Group 2: Sham + 3.0 mg/kg
- Group 3: Stroke + Vehicle
- Group 4: Stroke + 3.0 mg/kg
- Group 5: Stroke + 0.3 mg/kg

# Overview of Experimental Design (Angiogenesis, Neurogenesis, and Gliosis – Striatal Strokes)

**B**

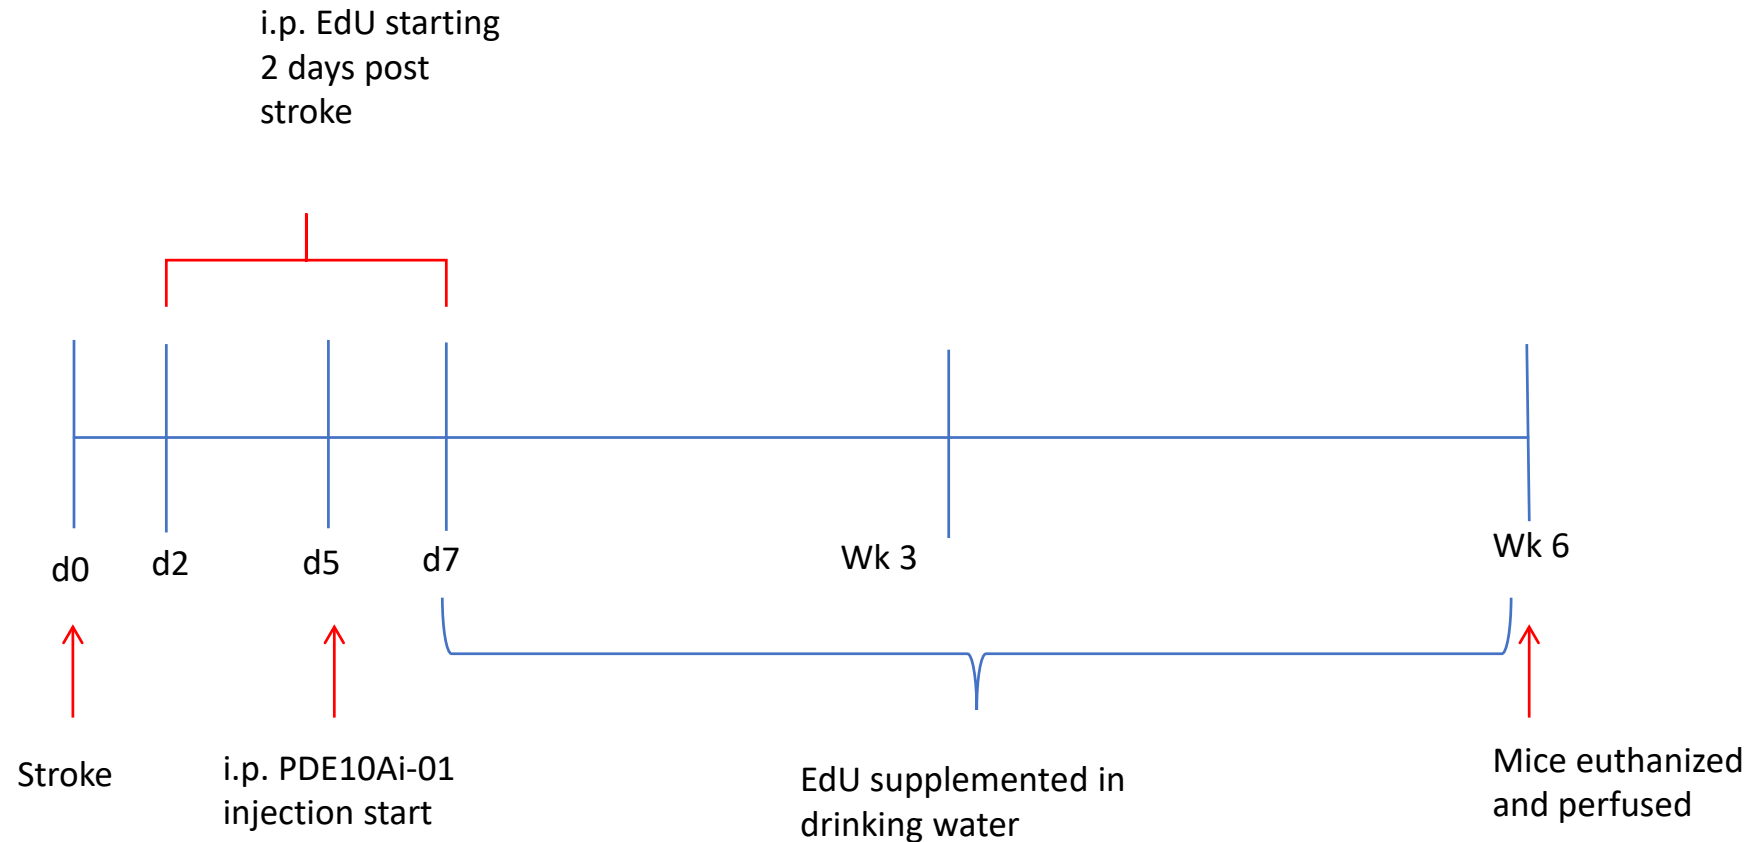

# Cortical Stroke Infarct Volumes

**A**

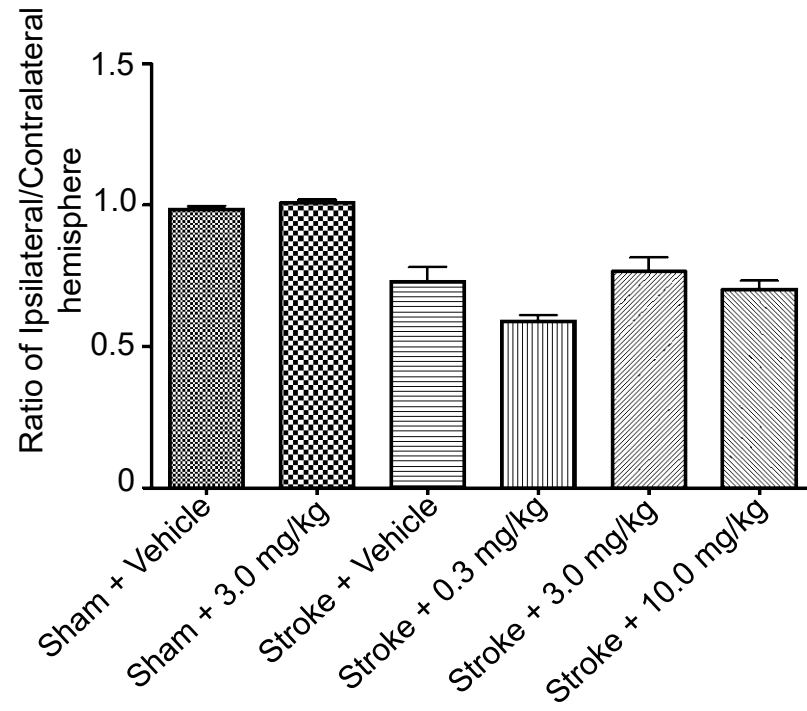

**B**

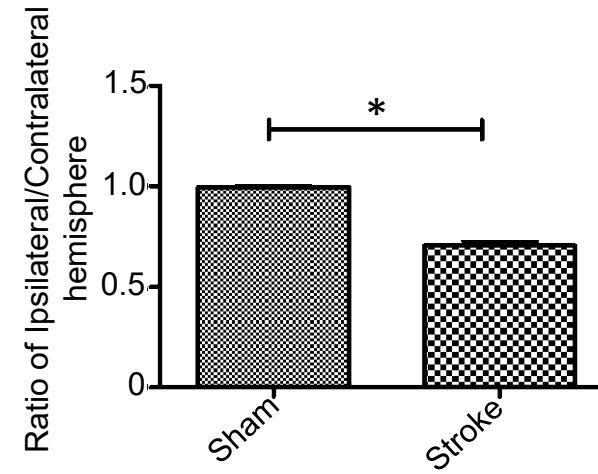

# Striatal Stroke Infarct Volumes (-0.22 mm to -1.94 mm)

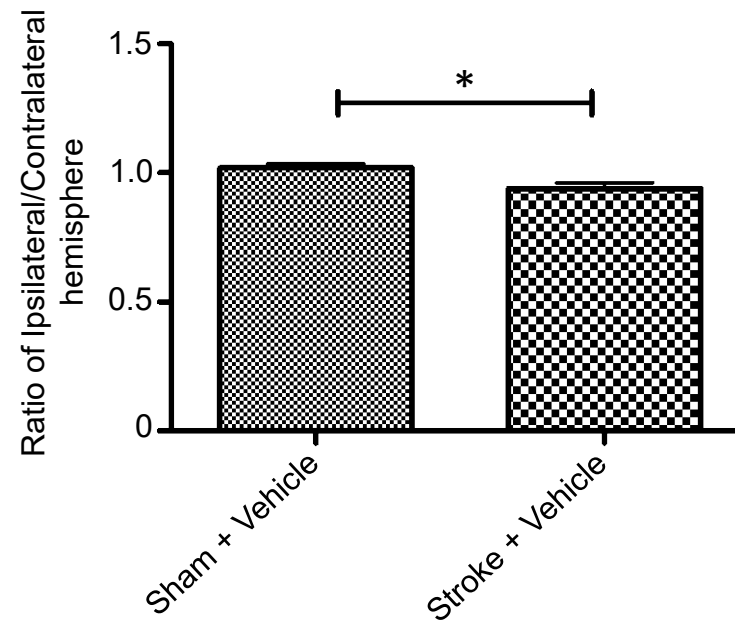

# Table 1

| Figure                                    | Statistical Test | t Value | df Value | F Value          | z Value                                      |
|-------------------------------------------|------------------|---------|----------|------------------|----------------------------------------------|
| Figure 1A                                 | GLM              | -       | -        | -                | z = 2.901 at 6 weeks<br>z = 2.984 at 9 weeks |
| Figure 2                                  | Unpaired t test  | 5.982   | 18       | -                |                                              |
| Figure 3C                                 | ANOVA            | -       | -        | F(4, 17) = 10.69 |                                              |
| Figure 3D                                 | ANOVA            | -       | -        | F(4, 17) = 10.69 |                                              |
| Figure 4A                                 | Unpaired t test  | 0.2513  | 11       | -                |                                              |
| Figure 4B                                 | Unpaired t test  | 1.461   | 11       | -                |                                              |
| Figure 4C                                 | Unpaired t test  | 1.718   | 11       | -                |                                              |
| Figure 5A (top)                           | ANOVA            | -       | -        | F(4,15) = 32.6   |                                              |
| Figure 5A (bottom)                        | ANOVA            | -       | -        | F(3,9) = 9.700   |                                              |
| Figure 5B                                 | ANOVA            | -       | -        | F(3,8) = 0.3004  |                                              |
| Figure 5C                                 | ANOVA            | -       | -        | F(3,8) = 0.7663  |                                              |
| Figure 5D                                 | ANOVA            | -       | -        | F(3, 10) = 4.040 |                                              |
| Figure 6C                                 | Unpaired t test  | 2.919   | 15       | -                |                                              |
| Figure 6D                                 | Unpaired t test  | 3.120   | 48       | -                |                                              |
| S Figure 2                                | GLM              | -       | -        | F(3, 11) = 1.511 |                                              |
| S Figure 6A (Sham vs. Stroke + 3.0 mg/kg) | Unpaired t test  | 4.118   | 19       | -                |                                              |
| S Figure 6b (Sham vs. Stroke + Veh)       | Unpaired t test  | 4.553   | 19       | -                |                                              |
| S Figure 7                                | Unpaired t test  | 8.842   | 60       | -                |                                              |

Table 2

## proBDNF levels by ELISA

| <u>Sample</u>              | <u>AdjConc (pg/mL)</u> | <u>Tot. Protein (mg/mL)</u> | <u>proBDNF pg per mg total protein</u> |
|----------------------------|------------------------|-----------------------------|----------------------------------------|
| Stroke + Vehicle Ipsi #1   | 100.233                | 1.667                       | <b>60.12777445</b>                     |
| Stroke + Vehicle Ipsi #2   | 50.664                 | 2.038                       | <b>24.85966634</b>                     |
| Stroke + Vehicle Ipsi #3   | 56.036                 | 1.94                        | <b>28.88453608</b>                     |
| Stroke + Vehicle Ipsi #4   | 93.006                 | 2.815                       | <b>33.03943162</b>                     |
| Stroke + 1mg/kg Ipsi #1    | 136.551                | 1.848                       | <b>73.89123377</b>                     |
| Stroke + 1mg/kg Ipsi #2    | 73.308                 | 1.806                       | <b>40.59136213</b>                     |
| Stroke + 1mg/kg Ipsi #3    | 185.352                | 2.382                       | <b>77.81360202</b>                     |
| Stroke + 1mg/kg Ipsi #4    | 86.161                 | 2.223                       | <b>38.75888439</b>                     |
| Stroke + 3mg/kg Ipsi #1    | 75.5                   | 2.135                       | <b>35.36299766</b>                     |
| Stroke + 3mg/kg Ipsi #2    | 58.541                 | 1.93                        | <b>30.33212435</b>                     |
| Stroke + 3mg/kg Ipsi #3    | 49.833                 | 1.797                       | <b>27.7312187</b>                      |
| Stroke + 3mg/kg Ipsi #5    | 36.645                 | 2.074                       | <b>17.66875603</b>                     |
| Stroke + Vehicle Contra #1 | 68.654                 | 1.995                       | <b>34.41303258</b>                     |
| Stroke + Vehicle Contra #2 | 71.518                 | 2.259                       | <b>31.65914121</b>                     |
| Stroke + Vehicle Contra #3 | 116.092                | 2.424                       | <b>47.89273927</b>                     |
| Stroke + Vehicle Contra #4 | 53.724                 | 2.125                       | <b>25.28188235</b>                     |
| Stroke + 1mg/kg Contra #1  | 68.43                  | 2.543                       | <b>26.90916241</b>                     |
| Stroke + 1mg/kg Contra #2  | 100.546                | 2.133                       | <b>47.13830286</b>                     |
| Stroke + 1mg/kg Contra #3  | 58.233                 | 2.458                       | <b>23.69121237</b>                     |
| Stroke + 1mg/kg Contra #4  | 52.665                 | 2.289                       | <b>23.0078637</b>                      |
| Stroke + 3mg/kg Contra #1  | 75.028                 | 2.169                       | <b>34.59105579</b>                     |
| Stroke + 3mg/kg Contra #2  | 48.571                 | 2.285                       | <b>21.25645514</b>                     |
| Stroke + 3mg/kg Contra #3  | 50.167                 | 2.281                       | <b>21.99342394</b>                     |
| Stroke + 3mg/kg Contra #4  | 48.443                 | 2.233                       | <b>21.69413345</b>                     |



# Table 3

## p75NTR levels by ELISA

| <u>Sample</u>              | <u>AdjConc (pg/mL)</u> | <u>Tot. Protein (mg/mL)</u> | <u>p75NTR pg per mg total protein</u> |
|----------------------------|------------------------|-----------------------------|---------------------------------------|
| Stroke + Vehicle Ipsi #1   | 1280.234               | 1.667                       | 767.9868026                           |
| Stroke + Vehicle Ipsi #2   | 1316.615               | 2.038                       | 646.0328754                           |
| Stroke + Vehicle Ipsi #3   | 1554.233               | 1.94                        | 801.1510309                           |
| Stroke + Vehicle Ipsi #4   | 1633.752               | 2.815                       | 580.3737123                           |
| Stroke + 1mg/kg Ipsi #1    | 1343.479               | 1.848                       | 726.9908009                           |
| Stroke + 1mg/kg Ipsi #2    | 1130.493               | 1.806                       | 625.9651163                           |
| Stroke + 1mg/kg Ipsi #3    | 1518.558               | 2.382                       | 637.5138539                           |
| Stroke + 1mg/kg Ipsi #4    | 1727.118               | 2.223                       | 776.9311741                           |
| Stroke + 3mg/kg Ipsi #1    | 1385.603               | 2.135                       | 648.9943794                           |
| Stroke + 3mg/kg Ipsi #2    | 1447.199               | 1.93                        | 749.8440415                           |
| Stroke + 3mg/kg Ipsi #3    | 972.927                | 1.797                       | 541.4173623                           |
| Stroke + 3mg/kg Ipsi #6    | 1081.337               | 1.814                       | 596.1063947                           |
| Sham + Vehicle Ipsi #1     | 1075.575               | 1.586                       | 678.168348                            |
| Sham + Vehicle Ipsi #2     | 1249.055               | 1.915                       | 652.2480418                           |
| Sham + Vehicle Ipsi #3     | 1388.042               | 1.991                       | 697.158212                            |
| Sham + Vehicle Ipsi #4     | 1109.045               | 1.92                        | 577.6276042                           |
| Stroke + Vehicle Contra #1 | 1463.272               | 1.995                       | 733.4696742                           |
| Stroke + Vehicle Contra #2 | 1327.155               | 2.259                       | 587.4966799                           |
| Stroke + Vehicle Contra #3 | 1659.107               | 2.424                       | 684.4500825                           |
| Stroke + Vehicle Contra #4 | 1257.69                | 2.125                       | 591.8541176                           |
| Stroke + 1mg/kg Contra #1  | 1441.052               | 2.543                       | 566.6740071                           |
| Stroke + 1mg/kg Contra #2  | 1304.699               | 2.133                       | 611.6732302                           |
| Stroke + 1mg/kg Contra #3  | 1262.233               | 2.458                       | 513.5203417                           |
| Stroke + 1mg/kg Contra #4  | 1388.019               | 2.289                       | 606.3866317                           |
| Stroke + 3mg/kg Contra #1  | 1587.045               | 2.169                       | 731.6943292                           |
| Stroke + 3mg/kg Contra #2  | 1552.077               | 2.285                       | 679.2459519                           |
| Stroke + 3mg/kg Contra #3  | 1464.712               | 2.281                       | 642.1359053                           |
| Stroke + 3mg/kg Contra #6  | 1360.693               | 1.771                       | 768.3190288                           |
| Sham + Vehicle Contra #1   | 661.828                | 1.219                       | 542.9269893                           |
| Sham + Vehicle Contra #2   | 1100.212               | 1.865                       | 589.9260054                           |
| Sham + Vehicle Contra #3   | 896.411                | 1.833                       | 489.040371                            |
| Sham + Vehicle Contra #4   | 1086.289               | 1.814                       | 598.8362734                           |

# Table 4

## pTrkB levels by ELISA

| <u>Sample</u>              | <u>OD</u> |
|----------------------------|-----------|
| Stroke + Vehicle Ipsi #1   | 0.022     |
| Stroke + Vehicle Ipsi #3   | 0.006     |
| Stroke + Vehicle Ipsi #5   | 0.061     |
| Stroke + Vehicle Ipsi #6   | 0.017     |
| Stroke + 1mg/kg Ipsi #1    | 0.061     |
| Stroke + 1mg/kg Ipsi #2    | 0.153     |
| Stroke + 1mg/kg Ipsi #3    | 0.107     |
| Stroke + 3mg/kg Ipsi #1    | 0.05      |
| Stroke + 3mg/kg Ipsi #4    | 0.061     |
| Stroke + 3mg/kg Ipsi #6    | 0.029     |
| Sham + Vehicle Ipsi #1     | 0.008     |
| Sham + Vehicle Ipsi #2     | 0.025     |
| Sham + Vehicle Ipsi #3     | 0.013     |
| Stroke + Vehicle Contra #1 | 0.061     |
| Stroke + Vehicle Contra #3 | 0.094     |
| Stroke + Vehicle Contra #5 | 0.144     |
| Stroke + Vehicle Contra #6 | 0.163     |
| Stroke + 1mg/kg Contra #1  | 0.106     |
| Stroke + 1mg/kg Contra #2  | 0.095     |
| Stroke + 1mg/kg Contra #3  | 0.188     |
| Stroke + 3mg/kg Contra #1  | 0.073     |
| Stroke + 3mg/kg Contra #4  | 0.005     |
| Stroke + 3mg/kg Contra #6  | 0.009     |
| Stroke + 3mg/kg Contra #7  | 0.008     |
| Sham + Vehicle Contra #1   | 0.003     |
| Sham + Vehicle Contra #2   | 0.103     |
| Sham + Vehicle Contra #3   | 0.221     |

Note that the standards for the pTrkB failed repeatedly. For this reason the data are reported as raw optical density measurements
